# Supplementary material
Source: PubMed Central journal article supplement (PMC6134232)
Supplement: jcsm.14.9.1521s1.pdf [file jcsm.14.9.1521s1.pdf]

**Appendix 1**—Demographic and clinical characteristics of Gout by the occurrence of obstructive sleep apnea.

|                                              | <b>No Gout (n = 1,643,953)</b>          |                                   | <b>Gout (n = 92,851)</b>             |                                  |
|----------------------------------------------|-----------------------------------------|-----------------------------------|--------------------------------------|----------------------------------|
|                                              | <b>No Sleep Apnea<br/>n = 1,605,211</b> | <b>Sleep Apnea<br/>n = 38,742</b> | <b>No Sleep Apnea<br/>n = 88,624</b> | <b>Sleep Apnea<br/>n = 4,227</b> |
| Age, years, mean (SD)                        | 75.4 (7.6)                              | 71.6 (5.3)                        | 75.4 (7.0)                           | 71.8 (5.1)                       |
| Sex, n (%)                                   |                                         |                                   |                                      |                                  |
| Male                                         | 660,326 (41.1%)                         | 22,099 (57.0%)                    | 50,853 (57.4%)                       | 2,940 (69.6%)                    |
| Female                                       | 944,885 (58.9%)                         | 16,643 (43.0%)                    | 37,771 (42.6%)                       | 1,287 (30.4%)                    |
| Race, n (%)                                  |                                         |                                   |                                      |                                  |
| White                                        | 1,384,761 (86.3%)                       | 35,119 (90.6%)                    | 72,646 (82.0%)                       | 3,683 (87.1%)                    |
| Black                                        | 128,968 (8.0%)                          | 2,409 (6.2%)                      | 10,784 (12.2%)                       | 407 (9.6%)                       |
| Others                                       | 91,482 (5.7%)                           | 1,214 (3.1%)                      | 5,194 (5.9%)                         | 137 (3.2%)                       |
| Charlson-Romano comorbidity score, mean (SD) | 1.5 (2.4)                               | 2.2 (2.5)                         | 2.4 (2.7)                            | 3.1 (2.9)                        |
| Charlson-Romano comorbidity score, n (%)     |                                         |                                   |                                      |                                  |
| 0                                            | 868,389 (54.1%)                         | 13,950 (36.0%)                    | 29,865 (33.7%)                       | 1,019 (24.1%)                    |
| 1                                            | 158,078 (9.8%)                          | 4,776 (12.3%)                     | 11,454 (12.9%)                       | 532 (12.6%)                      |
| ≥ 2                                          | 578,744 (36.1%)                         | 20,016 (51.7%)                    | 47,305 (53.4%)                       | 2,676 (63.3%)                    |
| Charlson-Romano comorbidities, n (%)         |                                         |                                   |                                      |                                  |
| Myocardial infarction                        | 60,621 (3.8%)                           | 2,249 (5.8%)                      | 5,891 (6.6%)                         | 329 (7.8%)                       |
| Heart failure                                | 176,709 (11.0%)                         | 6,854 (17.7%)                     | 19,412 (21.9%)                       | 1,204 (28.5%)                    |
| Peripheral vascular disease                  | 151,445 (9.4%)                          | 4,510 (11.6%)                     | 13,320 (15.0%)                       | 698 (16.5%)                      |
| Cerebrovascular disease                      | 153,550 (9.6%)                          | 4,328 (11.2%)                     | 11,416 (12.9%)                       | 523 (12.4%)                      |
| Dementia                                     | 75,502 (4.7%)                           | 558 (1.4%)                        | 2,312 (2.6%)                         | 44 (1.0%)                        |
| Chronic pulmonary disease                    | 241,351 (15.0%)                         | 10,758 (27.8%)                    | 18,084 (20.4%)                       | 1,337 (31.6%)                    |
| Connective tissue disease                    | 43,083 (2.7%)                           | 1,416 (3.7%)                      | 3,709 (4.2%)                         | 165 (3.9%)                       |
| Peptic ulcer disease                         | 29,572 (1.8%)                           | 820 (2.1%)                        | 2,461 (2.8%)                         | 115 (2.7%)                       |
| Mild liver disease                           | 7,599 (0.47%)                           | 265 (0.68%)                       | 660 (0.74%)                          | 37 (0.88%)                       |
| Diabetes                                     | 280,378 (17.5%)                         | 12,035 (31.1%)                    | 27,132 (30.6%)                       | 1,809 (42.8%)                    |

|                                  | No Gout (n = 1,643,953)         |                           | Gout (n = 92,851)            |                          |
|----------------------------------|---------------------------------|---------------------------|------------------------------|--------------------------|
|                                  | No Sleep Apnea<br>n = 1,605,211 | Sleep Apnea<br>n = 38,742 | No Sleep Apnea<br>n = 88,624 | Sleep Apnea<br>n = 4,227 |
| Diabetes with end organ damage   | 81,307 (5.1%)                   | 4,167 (10.8%)             | 8,758 (9.9%)                 | 699 (16.5%)              |
| Hemiplegia                       | 13,336 (0.83%)                  | 293 (0.76%)               | 755 (0.85%)                  | 36 (0.85%)               |
| Renal failure/disease            | 47,970 (3.0%)                   | 1,633 (4.2%)              | 9,693 (10.9%)                | 531 (12.6%)              |
| Any tumor leukemia lymphoma      | 158,337 (9.9%)                  | 4,752 (12.3%)             | 11,534 (13.0%)               | 528 (12.5%)              |
| Moderate or severe liver disease | 1,833 (0.11%)                   | 35 (0.09%)                | 133 (0.15%)                  | 7 (0.17%)                |
| Metastatic cancer                | 17,075 (1.1%)                   | 265 (0.68%)               | 678 (0.77%)                  | 29 (0.69%)               |
| AIDS                             | 514 (0.03%)                     | 10 (0.03%)                | 26 (0.03%)                   | 3 (0.07%)                |
| Hypertension, n (%)              | 747,126 (46.5%)                 | 25,262 (65.2%)            | 64,100 (72.3%)               | 3,263 (77.2%)            |
| Hyperlipidemia, n (%)            | 536,732 (33.4%)                 | 20,856 (53.8%)            | 44,871 (50.6%)               | 2,482 (58.7%)            |
| Coronary artery disease, n (%)   | 266,690 (16.6%)                 | 11,091 (28.6%)            | 26,442 (29.8%)               | 1,568 (37.1%)            |

SD = standard deviation.
